# Supplementary material
Source: publisher site journal article supplement (https://www.spandidos-publications.com/6771/downloadSupplementary)
Supplement: Supplementary file 1 [file downloadSupplementary]

## Sheet: Supplementary_Table_SVII
Table SVII. List of genes from the black module.
Gene symbol	Module color	GS.Strep	P-value GS.Strep	MM.black	P-value MM.black
ZNF696	Black	0.508519	0.00348895	0.801778	5.91e-08
ZNF660	Black	0.52664	0.00233772	0.852678	1.13e-09
C11orf87	Black	0.531989	0.0020683	0.807489	4.03e-08
ARMC12	Black	0.53421	0.00196463	0.85667	7.81e-10
ATP6V1H	Black	0.535502	0.00190641	0.812652	2.81e-08
MFSD3	Black	0.543254	0.00158761	0.82662	1.01e-08
NDRG4	Black	0.543255	0.00158759	0.83288	6.16e-09
B4GALNT1	Black	0.546048	0.0014847	0.830924	7.2e-09
MFAP2	Black	0.552499	0.00126899	0.872304	1.63e-10
TENM3	Black	0.552694	0.00126291	0.834942	5.22e-09
BASP1	Black	0.55396	0.00122413	0.864369	3.69e-10
CFAP161	Black	0.555538	0.00117721	0.801365	6.08e-08
FABP9	Black	0.560223	0.00104712	0.821725	1.46e-08
COL23A1	Black	0.565252	0.000921655	0.866758	2.9e-10
DBN1	Black	0.568264	0.000852988	0.813989	2.56e-08
OR8G5	Black	0.568519	0.000847396	0.828261	8.87e-09
TRIM6	Black	0.571332	0.000787704	0.838813	3.8e-09
SRSF12	Black	0.582376	0.000587571	0.822604	1.36e-08
ROR2	Black	0.583405	0.000571434	0.860215	5.56e-10
CUBN	Black	0.583405	0.000571423	0.896682	8.86e-12
CXorf66	Black	0.584348	0.000556992	0.820513	1.59e-08
SRL	Black	0.589305	0.000486229	0.819374	1.73e-08
IGSF1	Black	0.589378	0.000485247	0.815326	2.33e-08
ADGRB3	Black	0.589629	0.000481892	0.858115	6.81e-10
ABCC8	Black	0.590077	0.000475957	0.834646	5.35e-09
PRR23B	Black	0.591908	0.000452349	0.826457	1.02e-08
SLC35G4	Black	0.592887	0.000440162	0.856559	7.89e-10
AL121594.1	Black	0.594484	0.00042089	0.809932	3.4e-08
CBLL2	Black	0.59672	0.000395171	0.806476	4.31e-08
FADS6	Black	0.597401	0.000387612	0.878184	8.54e-11
FGF16	Black	0.599857	0.000361423	0.848968	1.58e-09
NAV3	Black	0.600351	0.000356351	0.875313	1.17e-10
SLC26A7	Black	0.600663	0.000353179	0.873438	1.44e-10
KCNG4	Black	0.605984	0.000302784	0.846747	1.93e-09
KCNN1	Black	0.606817	0.000295504	0.851773	1.23e-09
MYL10	Black	0.610159	0.000267821	0.801285	6.11e-08
OR4D9	Black	0.610253	0.000267077	0.814977	2.38e-08
CHD4	Black	0.610549	0.000264741	0.805573	4.59e-08
SDC2	Black	0.611124	0.000260266	0.894591	1.17e-11
CSMD1	Black	0.615606	0.000227604	0.81874	1.82e-08
ST8SIA4	Black	0.617247	0.00021659	0.854601	9.48e-10
RXRG	Black	0.618812	0.000206531	0.911254	1.08e-12
HOXA9	Black	0.619178	0.000204235	0.800609	6.39e-08
TMEM252	Black	0.619364	0.000203081	0.853934	1.01e-09
PGA3	Black	0.619392	0.000202907	0.869276	2.24e-10
NKX3-2	Black	0.620571	0.000195717	0.858933	6.3e-10
MT1HL1	Black	0.623536	0.00017863	0.863958	3.85e-10
AWAT1	Black	0.62376	0.000177391	0.825339	1.11e-08
TEX13D	Black	0.624483	0.000173458	0.847933	1.74e-09
GJC2	Black	0.626484	0.000162964	0.865108	3.43e-10
SNTB1	Black	0.629422	0.000148587	0.892674	1.5e-11
LPAR4	Black	0.632223	0.000135938	0.901022	4.89e-12
GNG4	Black	0.632811	0.000133407	0.828064	9e-09
AC017083.3	Black	0.634289	0.000127235	0.815982	2.22e-08
IGDCC4	Black	0.635134	0.000123821	0.843061	2.65e-09
NCAM1	Black	0.635855	0.000120974	0.926609	7.57e-14
DYNLRB2	Black	0.636709	0.000117672	0.811491	3.05e-08
MPC1L	Black	0.638299	0.000111745	0.872847	1.53e-10
NKAIN1	Black	0.639642	0.000106948	0.934327	1.59e-14
PCDHB2	Black	0.640618	0.000103578	0.917397	3.96e-13
TMEM101	Black	0.64088	0.000102689	0.803575	5.25e-08
PROKR1	Black	0.641323	0.000101202	0.80937	3.54e-08
SLC14A2	Black	0.642822	9.63e-05	0.884217	4.25e-11
OPN5	Black	0.642838	9.63e-05	0.893393	1.37e-11
FYN	Black	0.643362	9.46e-05	0.906368	2.27e-12
EREG	Black	0.64429	9.17e-05	0.821446	1.49e-08
CPNE4	Black	0.644351	9.15e-05	0.862013	4.67e-10
ACTRT1	Black	0.645131	8.92e-05	0.8783	8.43e-11
LINC02218	Black	0.646018	8.66e-05	0.884594	4.07e-11
CDH20	Black	0.646336	8.57e-05	0.857851	6.98e-10
OR6K3	Black	0.647974	8.11e-05	0.816909	2.08e-08
OR1K1	Black	0.64896	7.84e-05	0.848855	1.6e-09
CKM	Black	0.650343	7.48e-05	0.838391	3.93e-09
CHST2	Black	0.650507	7.44e-05	0.914662	6.24e-13
WNT8A	Black	0.650945	7.33e-05	0.875065	1.21e-10
C10orf82	Black	0.65102	7.31e-05	0.910823	1.15e-12
B3GALT1	Black	0.653078	6.81e-05	0.850189	1.42e-09
GCSH	Black	0.654115	6.58e-05	0.914904	5.99e-13
SYT14	Black	0.656159	6.13e-05	0.928083	5.7e-14
LEUTX	Black	0.657018	5.95e-05	0.889812	2.15e-11
RUNDC3A	Black	0.65769	5.81e-05	0.889768	2.17e-11
EIF5AL1	Black	0.659017	5.54e-05	0.801067	6.2e-08
EPHA8	Black	0.659132	5.52e-05	0.912526	8.8e-13
TMEM59L	Black	0.661404	5.1e-05	0.935642	1.2e-14
MT1F	Black	0.663553	4.72e-05	0.821423	1.49e-08
SIAH3	Black	0.664893	4.5e-05	0.891634	1.71e-11
PCDHGB1	Black	0.666977	4.18e-05	0.848785	1.61e-09
CA7	Black	0.667257	4.13e-05	0.900788	5.06e-12
AC010542.3	Black	0.66782	4.05e-05	0.814514	2.46e-08
OR1A1	Black	0.668163	4e-05	0.858547	6.54e-10
KCNIP4	Black	0.669457	3.82e-05	0.907857	1.81e-12
PGM5	Black	0.670126	3.72e-05	0.872539	1.59e-10
TYR	Black	0.672579	3.4e-05	0.868794	2.35e-10
RND2	Black	0.673437	3.3e-05	0.903351	3.52e-12
SCN9A	Black	0.674718	3.14e-05	0.86871	2.37e-10
CFAP57	Black	0.675155	3.09e-05	0.812945	2.76e-08
HBQ1	Black	0.675484	3.05e-05	0.88854	2.52e-11
SLC29A4	Black	0.675689	3.03e-05	0.942688	2.33e-15
ERC2	Black	0.678113	2.77e-05	0.886542	3.22e-11
SOX6	Black	0.678472	2.73e-05	0.939132	5.45e-15
RGS20	Black	0.678729	2.7e-05	0.906093	2.36e-12
PRAMEF10	Black	0.681047	2.48e-05	0.843281	2.61e-09
FGF23	Black	0.681504	2.43e-05	0.845303	2.19e-09
TMEM233	Black	0.682558	2.34e-05	0.861311	5e-10
AC010132.3	Black	0.682813	2.31e-05	0.899071	6.41e-12
PCSK1N	Black	0.684884	2.14e-05	0.938633	6.12e-15
KCNJ1	Black	0.685402	2.09e-05	0.805432	4.63e-08
IGSF11	Black	0.68629	2.02e-05	0.864783	3.54e-10
CTXN3	Black	0.686969	1.97e-05	0.926169	8.23e-14
SBSPON	Black	0.6877	1.92e-05	0.902912	3.75e-12
OR4Q3	Black	0.688091	1.89e-05	0.847169	1.86e-09
TTYH1	Black	0.689225	1.8e-05	0.826968	9.8e-09
USH1G	Black	0.689826	1.76e-05	0.940067	4.38e-15
EGFL7	Black	0.690343	1.73e-05	0.891295	1.79e-11
OR8D4	Black	0.690577	1.71e-05	0.901923	4.31e-12
KIF19	Black	0.690599	1.71e-05	0.935941	1.12e-14
OBP2B	Black	0.691096	1.68e-05	0.925242	9.81e-14
NOBOX	Black	0.691856	1.63e-05	0.898488	6.94e-12
TEPP	Black	0.694913	1.44e-05	0.9219	1.81e-13
ADIPOQ	Black	0.695595	1.4e-05	0.880061	6.9e-11
PCDHB11	Black	0.696419	1.35e-05	0.894105	1.25e-11
SPANXB1	Black	0.697412	1.3e-05	0.935563	1.22e-14
SIT1	Black	0.697805	1.28e-05	0.812204	2.9e-08
VIM	Black	0.697966	1.27e-05	0.944827	1.36e-15
GFRA4	Black	0.698534	1.24e-05	0.943872	1.73e-15
CTXN1	Black	0.698752	1.23e-05	0.92906	4.7e-14
TFAP2D	Black	0.698941	1.22e-05	0.921585	1.91e-13
SYT4	Black	0.701007	1.12e-05	0.94586	1.04e-15
DPPA3	Black	0.701032	1.12e-05	0.915849	5.13e-13
CIBAR1	Black	0.701396	1.1e-05	0.820731	1.57e-08
SLC22A31	Black	0.702967	1.03e-05	0.944566	1.45e-15
PRAMEF15	Black	0.70789	8.42e-06	0.875913	1.1e-10
SLC6A5	Black	0.709466	7.87e-06	0.888265	2.61e-11
ZNF385D	Black	0.711462	7.22e-06	0.928765	4.98e-14
CSRP3	Black	0.715372	6.1e-06	0.892738	1.49e-11
THBS4	Black	0.715919	5.95e-06	0.9515	2.19e-16
LRRC10	Black	0.716822	5.72e-06	0.889979	2.11e-11
GDF2	Black	0.71684	5.72e-06	0.87083	1.9e-10
TMEM225	Black	0.717341	5.59e-06	0.937729	7.52e-15
CNTFR	Black	0.717933	5.45e-06	0.92093	2.15e-13
COPS5	Black	0.718248	5.37e-06	0.801713	5.94e-08
TPH1	Black	0.718419	5.33e-06	0.912909	8.28e-13
KRTAP5-3	Black	0.719617	5.06e-06	0.873005	1.51e-10
OR1D2	Black	0.720193	4.93e-06	0.933998	1.71e-14
RALYL	Black	0.72039	4.88e-06	0.96091	1.02e-17
GPX5	Black	0.721061	4.74e-06	0.943405	1.95e-15
SLC22A6	Black	0.721656	4.62e-06	0.905755	2.48e-12
GIP	Black	0.721944	4.56e-06	0.956224	5.11e-17
CELF3	Black	0.723181	4.31e-06	0.957908	2.93e-17
SLC17A6	Black	0.724831	4e-06	0.962703	5.23e-18
FUT9	Black	0.724979	3.97e-06	0.964944	2.16e-18
H1-8	Black	0.725307	3.91e-06	0.901053	4.87e-12
SCN1A	Black	0.725774	3.83e-06	0.940515	3.94e-15
CCDC105	Black	0.726584	3.69e-06	0.819924	1.67e-08
DOK6	Black	0.728599	3.36e-06	0.958045	2.79e-17
MTLN	Black	0.729545	3.22e-06	0.902759	3.83e-12
MMP16	Black	0.731897	2.88e-06	0.951711	2.06e-16
KCNJ13	Black	0.732603	2.79e-06	0.947876	6.09e-16
DEFB104B	Black	0.732857	2.76e-06	0.897702	7.73e-12
CABS1	Black	0.732857	2.76e-06	0.897702	7.73e-12
HOXA11	Black	0.733274	2.7e-06	0.915753	5.21e-13
ARX	Black	0.733991	2.61e-06	0.955324	6.83e-17
LGALS12	Black	0.735595	2.42e-06	0.920409	2.36e-13
SLC18A3	Black	0.735724	2.41e-06	0.960809	1.06e-17
LRCH2	Black	0.736366	2.33e-06	0.972906	5.42e-20
LCN15	Black	0.736874	2.28e-06	0.896258	9.38e-12
OLFM3	Black	0.737501	2.21e-06	0.942428	2.48e-15
PARVG	Black	0.738892	2.07e-06	0.904087	3.17e-12
HPCAL4	Black	0.744428	1.58e-06	0.913023	8.13e-13
AVP	Black	0.745561	1.49e-06	0.925443	9.44e-14
NTRK2	Black	0.745738	1.48e-06	0.952318	1.72e-16
CERS1	Black	0.746903	1.39e-06	0.94155	3.08e-15
ANP32D	Black	0.748437	1.29e-06	0.891926	1.65e-11
MAL	Black	0.748646	1.28e-06	0.953349	1.26e-16
ZNF735	Black	0.74876	1.27e-06	0.92175	1.86e-13
BHLHA9	Black	0.750336	1.17e-06	0.936255	1.04e-14
OR11A1	Black	0.750884	1.14e-06	0.923519	1.35e-13
DPPA5	Black	0.751535	1.1e-06	0.904119	3.15e-12
ZNF385B	Black	0.752312	1.06e-06	0.945782	1.06e-15
MYOZ3	Black	0.752496	1.05e-06	0.982176	1.33e-22
HOXA10	Black	0.752929	1.02e-06	0.944027	1.67e-15
POMC	Black	0.753187	1.01e-06	0.95184	1.98e-16
LACTBL1	Black	0.754216	9.59e-07	0.91934	2.84e-13
HNRNPCL2	Black	0.755331	9.05e-07	0.93332	1.97e-14
MICOS10-NBL1	Black	0.755845	8.81e-07	0.926031	8.45e-14
C18orf63	Black	0.756084	8.7e-07	0.959897	1.47e-17
TRIM75P	Black	0.756088	8.69e-07	0.965702	1.58e-18
PAX4	Black	0.756805	8.37e-07	0.942661	2.35e-15
NOG	Black	0.757114	8.24e-07	0.94493	1.33e-15
RFPL2	Black	0.757688	7.99e-07	0.978899	1.5e-21
FST	Black	0.758007	7.86e-07	0.957663	3.18e-17
PMP22	Black	0.759047	7.44e-07	0.942777	2.28e-15
SSTR3	Black	0.7616	6.49e-07	0.94994	3.43e-16
CENPVL3	Black	0.762141	6.3e-07	0.976732	6.11e-21
RIPOR2	Black	0.762416	6.21e-07	0.940023	4.43e-15
CHAT	Black	0.762962	6.03e-07	0.985969	4.23e-24
MTRNR2L11	Black	0.763048	6e-07	0.803419	5.3e-08
TAAR5	Black	0.763656	5.81e-07	0.929518	4.29e-14
PPP4R3C	Black	0.763857	5.74e-07	0.933828	1.77e-14
CRH	Black	0.764135	5.66e-07	0.992035	1.19e-27
CRX	Black	0.764668	5.5e-07	0.940804	3.68e-15
FGF17	Black	0.764773	5.46e-07	0.958626	2.29e-17
OCM2	Black	0.764921	5.42e-07	0.928923	4.83e-14
RGR	Black	0.766381	5e-07	0.982154	1.35e-22
PPP1R17	Black	0.766763	4.9e-07	0.97742	3.97e-21
MCF2	Black	0.767913	4.6e-07	0.960759	1.08e-17
RFX6	Black	0.768468	4.46e-07	0.839365	3.63e-09
FILIP1	Black	0.769627	4.18e-07	0.910591	1.19e-12
LDOC1	Black	0.771493	3.76e-07	0.979837	7.8e-22
GRIA3	Black	0.771812	3.7e-07	0.946323	9.22e-16
NKX2-1	Black	0.775428	3.01e-07	0.977295	4.3e-21
APOA1	Black	0.775448	3e-07	0.961355	8.67e-18
OR4X1	Black	0.775905	2.93e-07	0.947631	6.5e-16
POU5F1B	Black	0.780054	2.3e-07	0.87723	9.5e-11
TUBB4A	Black	0.780425	2.25e-07	0.980478	4.9e-22
MYBPHL	Black	0.781483	2.11e-07	0.971055	1.4e-19
CSMD3	Black	0.781725	2.08e-07	0.970746	1.63e-19
OR2AT4	Black	0.781859	2.06e-07	0.93934	5.19e-15
SELENOV	Black	0.781905	2.06e-07	0.983073	6.3e-23
TNP1	Black	0.781928	2.06e-07	0.954892	7.83e-17
TYRP1	Black	0.782375	2e-07	0.89302	1.43e-11
SLC6A13	Black	0.783213	1.9e-07	0.990654	1.2e-26
PCSK1	Black	0.783435	1.88e-07	0.979897	7.48e-22
SLC38A4	Black	0.783459	1.88e-07	0.982192	1.31e-22
SCN7A	Black	0.784487	1.76e-07	0.978283	2.27e-21
GOLGA8F	Black	0.785402	1.67e-07	0.955583	6.29e-17
MDGA2	Black	0.785522	1.66e-07	0.97777	3.17e-21
CYTL1	Black	0.786044	1.6e-07	0.982527	9.96e-23
TMEM52B	Black	0.786171	1.59e-07	0.872246	1.64e-10
GRIN2B	Black	0.786722	1.54e-07	0.981728	1.89e-22
OR7C2	Black	0.787143	1.5e-07	0.961704	7.62e-18
ANGPTL7	Black	0.787562	1.46e-07	0.962019	6.77e-18
IL31	Black	0.78818	1.41e-07	0.972756	5.86e-20
KCNK16	Black	0.788527	1.38e-07	0.977013	5.13e-21
MAGEC3	Black	0.788957	1.34e-07	0.979218	1.21e-21
IZUMO2	Black	0.790206	1.24e-07	0.972911	5.4e-20
MBIP	Black	0.790809	1.2e-07	0.92393	1.25e-13
BHMG1	Black	0.79129	1.16e-07	0.914321	6.59e-13
AMBN	Black	0.791801	1.12e-07	0.973745	3.45e-20
NEUROD1	Black	0.792129	1.1e-07	0.974727	2e-20
SLC10A2	Black	0.792261	1.09e-07	0.968345	5.02e-19
RIDA	Black	0.793081	1.04e-07	0.939951	4.5e-15
DGKK	Black	0.794083	9.74e-08	0.969356	3.16e-19
FABP7	Black	0.794095	9.73e-08	0.967924	6.07e-19
DUSP26	Black	0.794138	9.7e-08	0.974672	2.06e-20
OR7E24	Black	0.794492	9.49e-08	0.967844	6.29e-19
TRIM60	Black	0.794698	9.37e-08	0.967784	6.46e-19
TMEM247	Black	0.794698	9.37e-08	0.967784	6.46e-19
SPRR5	Black	0.794698	9.37e-08	0.967784	6.46e-19
SPANXD	Black	0.794698	9.37e-08	0.967784	6.46e-19
SPANXC	Black	0.794698	9.37e-08	0.967784	6.46e-19
SMCP	Black	0.794698	9.37e-08	0.967784	6.46e-19
OR10V1	Black	0.794698	9.37e-08	0.967784	6.46e-19
OOSP2	Black	0.794698	9.37e-08	0.967784	6.46e-19
LYZL6	Black	0.794698	9.37e-08	0.967784	6.46e-19
LGALS13	Black	0.794698	9.37e-08	0.967784	6.46e-19
DEFB121	Black	0.794698	9.37e-08	0.967784	6.46e-19
MAGEB2	Black	0.794986	9.2e-08	0.969262	3.3e-19
MT1H	Black	0.799149	7.03e-08	0.954028	1.03e-16
UNC5C	Black	0.802279	5.72e-08	0.966931	9.38e-19
ZNF536	Black	0.803179	5.39e-08	0.9585	2.39e-17
GOLGA8G	Black	0.805166	4.71e-08	0.911501	1.04e-12
IL36G	Black	0.809054	3.62e-08	0.933518	1.89e-14
THPO	Black	0.809674	3.46e-08	0.973109	4.87e-20
FOXG1	Black	0.810433	3.29e-08	0.881305	5.98e-11
KCNV1	Black	0.814634	2.44e-08	0.970044	2.28e-19
XCL1	Black	0.828964	8.4e-09	0.923836	1.27e-13
SOX3	Black	0.831617	6.81e-09	0.941234	3.32e-15
CLDN5	Black	0.833332	5.94e-09	0.849491	1.51e-09
PCDH9	Black	0.834647	5.35e-09	0.91692	4.29e-13
MYOZ1	Black	0.839545	3.57e-09	0.905187	2.7e-12
MT1A	Black	0.840521	3.29e-09	0.937659	7.63e-15
H2BW1	Black	0.841476	3.04e-09	0.963467	3.89e-18
CYLC2	Black	0.842384	2.81e-09	0.911737	9.97e-13
SPRR4	Black	0.850101	1.43e-09	0.960967	9.99e-18
TENM1	Black	0.853128	1.09e-09	0.967674	6.78e-19
CASQ1	Black	0.854862	9.26e-10	0.968695	4.28e-19
HOXC9	Black	0.855412	8.79e-10	0.918261	3.42e-13
DEFB126	Black	0.857711	7.08e-10	0.909433	1.43e-12
ZSCAN10	Black	0.86875	2.36e-10	0.95968	1.59e-17
PRAMEF18	Black	0.875786	1.11e-10	0.83352	5.85e-09
IGSF23	Black	0.878615	8.13e-11	0.950579	2.86e-16
PCDH15	Black	0.912275	9.16e-13	0.932516	2.33e-14
SPANXN2	Black	0.951109	2.46e-16	0.906775	2.13e-12
Strep, Streptococcus; GS, gene significance; MM, module membership.
